# Supplementary material for: The Prognostic Role of Lactate Concentrations after Aneurysmal Subarachnoid Hemorrhage
Source: MDPI journal article supplement (doi:10.3390/brainsci10121004), 2020-12-17
Supplement: s1 [file s1]

**Table S1.** Logistic regression analysis for hospital mortality.

|                 | <b>Univariate analysis</b> | <b>Multivariable analysis</b> |
|-----------------|----------------------------|-------------------------------|
|                 | <b>OR [CI 95%]</b>         | <b>OR [CI 95%]</b>            |
| Age             | 1.03 [1.02-1.05]           | 1.02 [1.01-1.04]              |
| Fisher 3-4      | 7.29 [1.70-31.21]          | 3.41 [0.78-14.85]             |
| Cirrhosis       | 7.71 [0.86-69.62]          | 10.50 [0.99-110.45]           |
| Hypotension     | 1.39 [0.86-2.26]           | 1.56 [0.90-2.68]              |
| Hyperlactatemia | 5.43 [3.19-9.25]           | 4.19 [2.38-7.39]              |
| Hyperglycemia   | 10.41 [3.19-33.97]         | 2.46 [1.56-3.90]              |
| Seizures        | 1.16 [0.74-1.82]           | 0.91 [0.56-1.05]              |

This model was constructed to assess causal association between hyperlactatemia and in-hospital mortality according to the directed acyclic graph presented on Fig S1. All other variables are confounders. Hyperlactatemia was defined as lactate >2.0 mmol/L at any time during the first 6 days of admission. Hyperglycemia was defined as a serum glucose >180 mg/dL at any time during the first 6 days of admission.

**Table S2.** Univariate and multivariable analysis of unfavorable neurological outcome.

|            | <b>Univariate analysis</b> | <b>Multivariable analysis</b> |
|------------|----------------------------|-------------------------------|
|            | <b>OR [CI 95%]</b>         | <b>OR [CI 95%]</b>            |
| Age        | 1.04 [1.02-1.06]           | 1.03 [1.02-1.05]              |
| Fisher 3-4 | 5.31 [3.20-8.79]           | 4.04 [1.02-15.92]             |

|                 |                  |                  |
|-----------------|------------------|------------------|
| Seizures        | 0.53 [0.34-0.81] | 1.42 [0.86-2.33] |
| Hypotension     | 0.73 [0.47-1.14] | 0.78 [0.47-1.31] |
| Hyperlactatemia | 5.91 [3.70-9.46] | 4.16 [2.52-6.88] |
| Hyperglycemia   | 4.15 [2.78-6.19] | 2.82 [1.82-4.34] |

This model was constructed to assess causal association between hyperlactatemia and unfavorable outcome in 3 months, according to the directed acyclic graph presented on Fig S2. All other variables are confounders. Hyperlactatemia was defined as lactate >2.0 mmol/L at any point during the first 6 days of admission. Hyperglycemia was defined as a serum glucose >180 mg/dL at any point during the first 6 days of ICU stay.

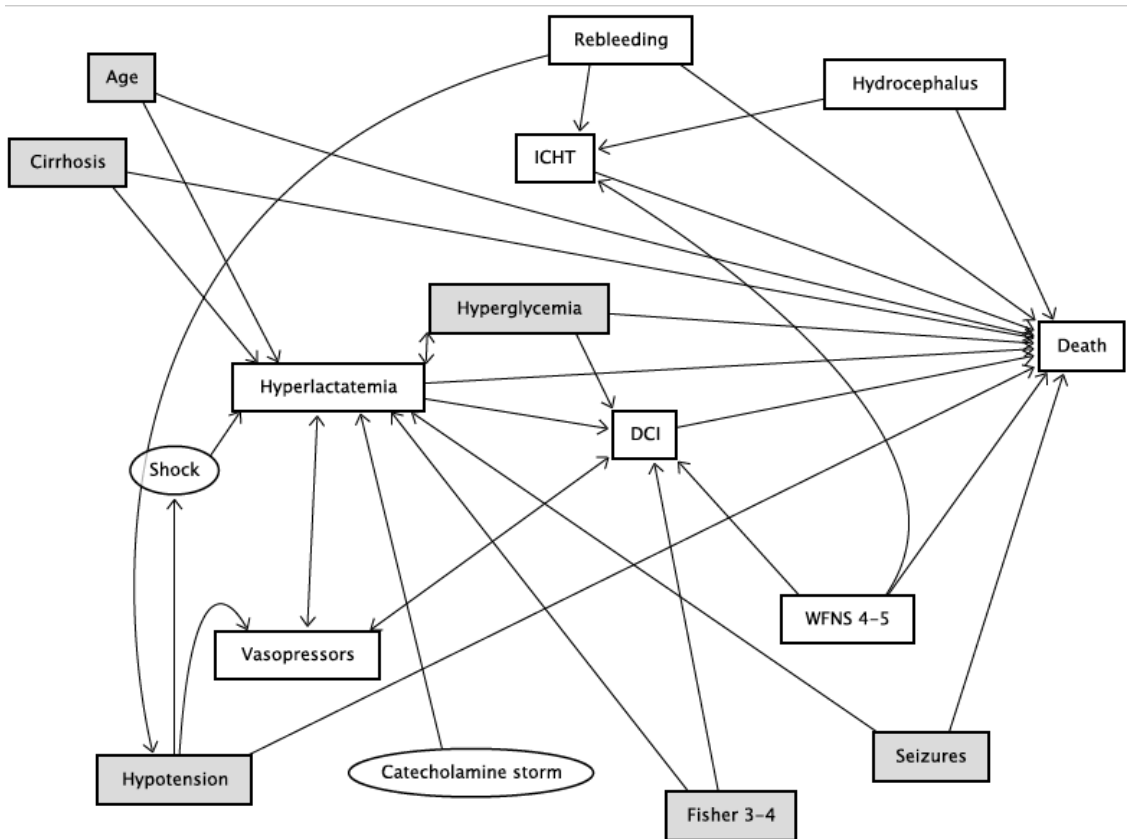

**Figure S1.** Directed acyclic graph for hospital mortality. This graph illustrates the causal relationship between hyperlactatemia in the first 6 days of hospital admission and in-hospital mortality (death). Variables in gray represent adjusted variables. Circular nodes represent unobserved variables and rectangular nodes represent other variables.

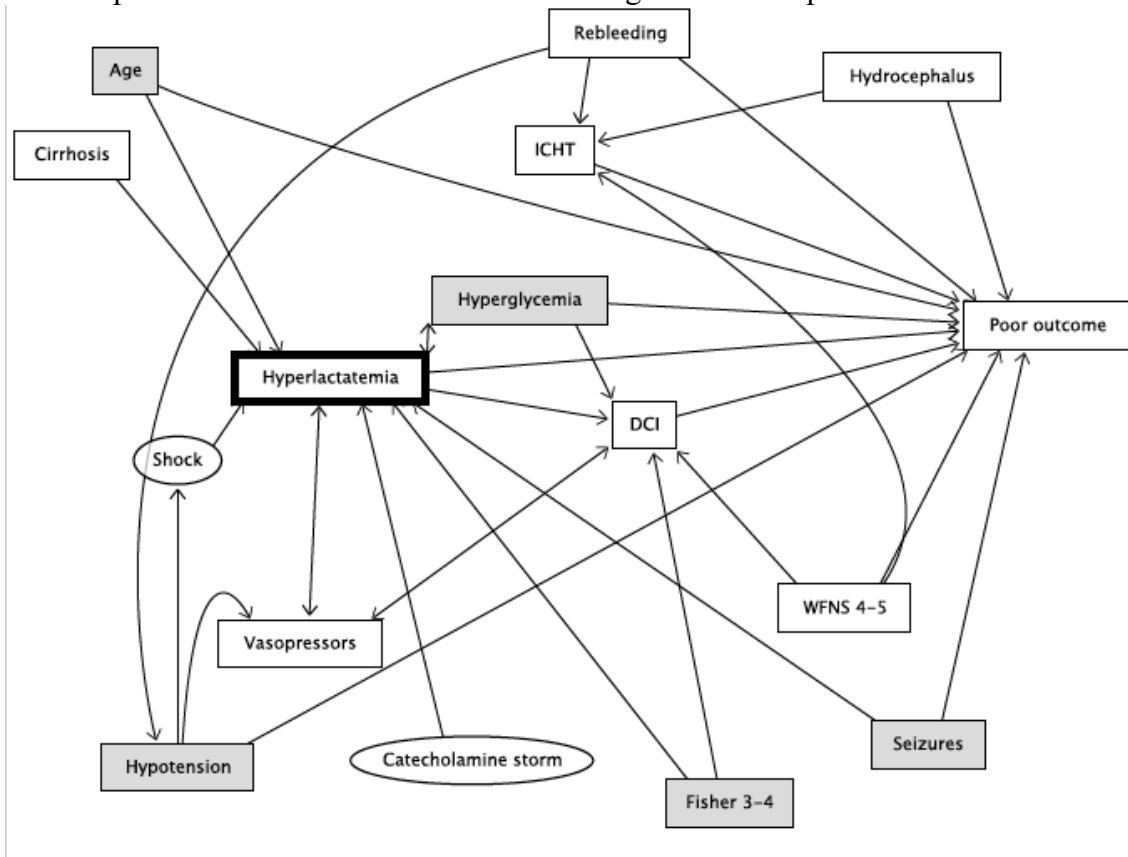

**Figure S2.** Directed acyclic graph for poor neurological outcome in 3 months. This graph illustrates the causal relationship between hyperlactatemia in the first 6 days of hospital admission and unfavorable neurological outcome in 3 months assessed by the Glasgow outcome scale. Variables in gray represent adjusted variables. Circular nodes represent unobserved variables and rectangular nodes represent other variables.
